# Supplementary material for: Substituent-Guided Cluster Nuclearity for Tetranuclear Iron(III) Compounds with Flat {Fe4(μ3-O)2} Butterfly Core
Source: MDPI journal article supplement (doi:10.3390/ijms24065808), 2023-03-18
Supplement: s1 [file s1]

# Substituent-Guided Cluster Nuclearity for Tetranuclear Iron(III) Compounds with Flat {Fe<sub>4</sub>(μ<sub>3</sub>-O)<sub>2</sub>} Butterfly Core

Lorenzo Marchi, Stefano Carlino, Carlo Castellano, Francesco Demartin, Alessandra Forni, Anna M. Ferretti, Alessandro Ponti, Alessandro Pasini and Luca Rigamonti

## SUPPLEMENTARY MATERIALS

|          |                                                                                                                                                                                                    |
|----------|----------------------------------------------------------------------------------------------------------------------------------------------------------------------------------------------------|
| Page S2  | <b>Figure S1.</b> Molecular structure of molecule A of <b>1</b> ·1.5 <sup>i</sup> Pr <sub>2</sub> O.                                                                                               |
| Page S3  | <b>Figure S2.</b> Overlap among the X-ray molecular structures of <b>1A</b> , <b>1B</b> and <b>2</b> , and the optimized geometries of <b>1</b> , <b>2</b> and <b>3</b> .                          |
| Page S4  | <b>Table S1.</b> Experimental bond distances and angles for compounds <b>1</b> ·1.5 <sup>i</sup> Pr <sub>2</sub> O and <b>2</b> ·2 <sup>i</sup> Pr <sub>2</sub> O from X-ray molecular structures. |
| Page S8  | <b>Table S2.</b> Selected distances for compounds <b>1</b> , <b>2</b> and <b>3</b> computed at the UB3LYP/6-31G(d), UM06/6-31G(d) and UM06/6-311G(d) levels of theory.                             |
| Page S10 | <b>Figure S3.</b> Spin states of compounds <b>1–3</b> as obtained by the best-fit procedure.                                                                                                       |

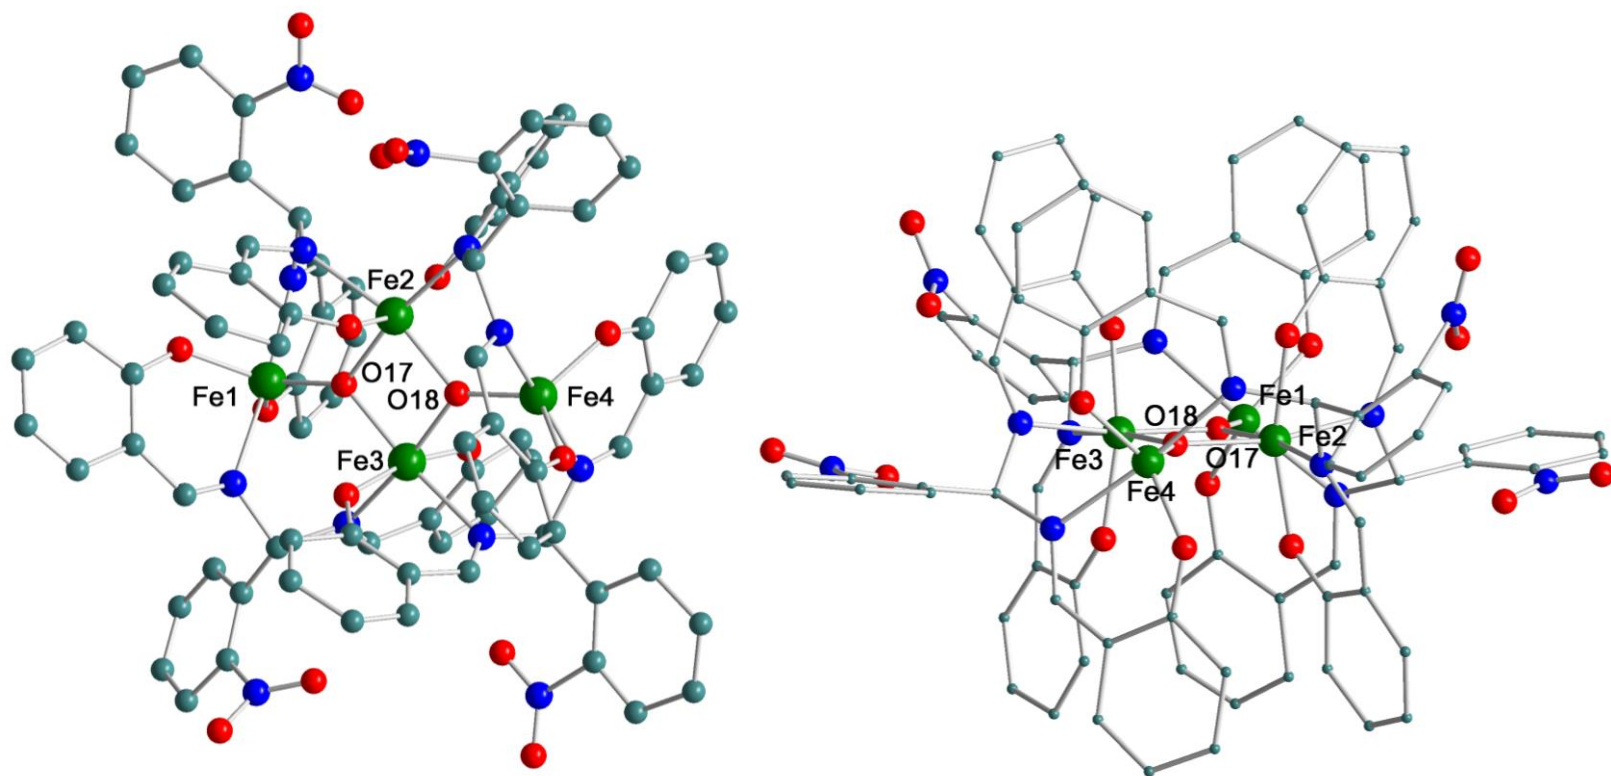

**Figure S1.** Molecular structure of molecule A of  $1 \cdot 1.5^i\text{Pr}_2\text{O}$ , in which the additional A symbols are omitted in the main atom numbering (dark green = Fe, red = O, blue = N, grey = C; hydrogen atoms are omitted for clarity).

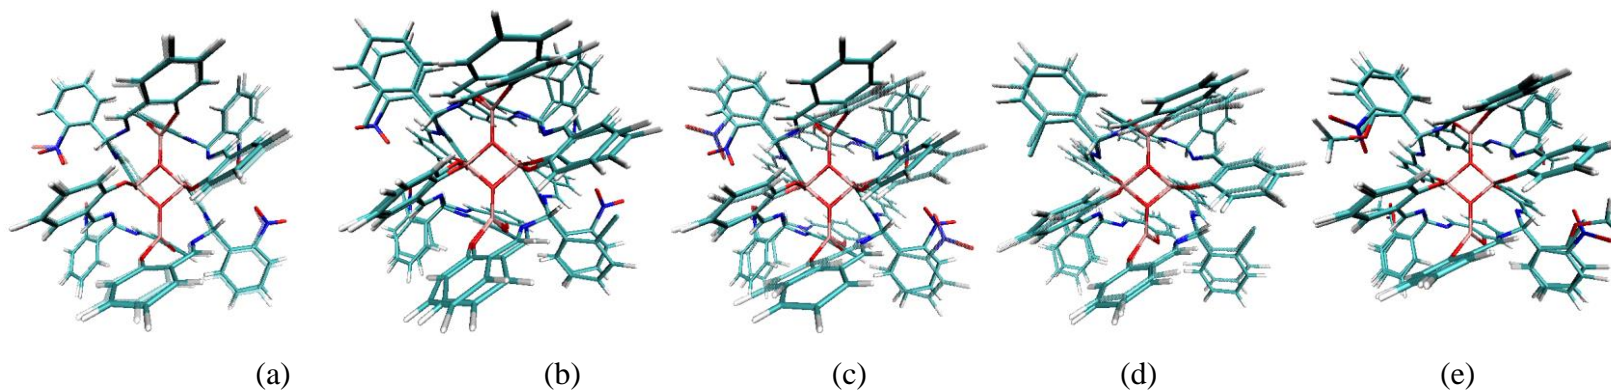

**Figure S2.** Overlap of (a) the X-ray molecular structures of **1A** and **1B** (molecule B transparent); (b) the X-ray molecular structures of **1A** and **2**; (c) the X-ray molecular structures of **1A** and the optimized geometry of **1** (the latter transparent); (d) the X-ray molecular structures of **2** and the optimized geometry of **2** (the latter transparent); and (e) the optimized geometries of **1–3**. For seek of clarity, Fe–N bonds are not drawn.

**Table S1.** Experimental bond distances (Å) and angles (°) for compounds **1**·1.5<sup>i</sup>Pr<sub>2</sub>O and **2**·2<sup>i</sup>Pr<sub>2</sub>O from X-ray molecular structures.

|                      | 1·1.5 <sup>i</sup> Pr <sub>2</sub> O |            | 2·2 <sup>i</sup> Pr <sub>2</sub> O |
|----------------------|--------------------------------------|------------|------------------------------------|
|                      | molecule A                           | molecule B |                                    |
| <i>Fe1 distances</i> |                                      |            |                                    |
| Fe1–N1               | 2.160(6)                             | 2.165(7)   | 2.1636(12)                         |
| Fe1–N4               | 2.193(6)                             | 2.171(6)   | 2.1930(15)                         |
| Fe1–O1               | 1.865(5)                             | 1.865(5)   | 1.9021(13)                         |
| Fe1–O5               | 1.925(5)                             | 1.925(5)   | 1.8662(12)                         |
| Fe1–O17              | 1.784(5)                             | 1.783(5)   | 1.7994(11)                         |
| <i>Fe2 distances</i> |                                      |            |                                    |
| Fe2–N3               | 2.211(6)                             | 2.198(7)   | 2.2609(12)                         |
| Fe2–N10              | 2.207(7)                             | 2.233(6)   | 2.2729(13)                         |
| Fe2–O4               | 1.964(5)                             | 1.924(5)   | 1.9698(13)                         |
| Fe2–O13              | 1.954(5)                             | 1.915(6)   | 1.9319(11)                         |
| Fe2–O17              | 1.948(5)                             | 1.979(5)   | 1.9380(12)                         |
| Fe2–O18              | 1.967(5)                             | 1.964(5)   | 1.9461(11)                         |
| <i>Fe3 distances</i> |                                      |            |                                    |
| Fe3–N6               | 2.208(6)                             | 2.214(6)   | 2.2237(14)                         |
| Fe3–N7               | 2.234(6)                             | 2.226(6)   | 2.2242(15)                         |
| Fe3–O8               | 1.941(5)                             | 1.961(5)   | 1.9687(13)                         |
| Fe3–O9               | 1.886(5)                             | 1.954(6)   | 1.9426(14)                         |
| Fe3–O17              | 1.970(5)                             | 1.948(5)   | 1.9567(11)                         |
| Fe3–O18              | 1.939(5)                             | 1.967(5)   | 1.9389(12)                         |
| <i>Fe4 distances</i> |                                      |            |                                    |
| Fe4–N9               | 2.212(6)                             | 2.181(6)   | 2.2074(15)                         |

|         |          |          |            |
|---------|----------|----------|------------|
| Fe4–N12 | 2.171(6) | 2.206(6) | 2.1518(14) |
| Fe4–O12 | 1.889(5) | 1.879(6) | 1.8809(13) |
| Fe4–O16 | 1.892(6) | 1.900(5) | 1.8907(13) |
| Fe4–O18 | 1.797(5) | 1.789(5) | 1.8040(11) |

*Fe...Fe distances*

|           |          |          |           |
|-----------|----------|----------|-----------|
| Fe1...Fe2 | 3.426(2) | 3.427(2) | 3.4241(4) |
| Fe1...Fe3 | 3.402(2) | 3.406(2) | 3.3738(5) |
| Fe2...Fe3 | 2.929(2) | 2.937(2) | 2.9683(4) |
| Fe2...Fe4 | 3.413(2) | 3.415(2) | 3.4211(5) |
| Fe3...Fe4 | 3.420(2) | 3.428(2) | 3.3737(4) |
| Fe1...Fe4 | 6.168(2) | 6.172(2) | 6.1129(7) |

*$\mu_3$ -O angles*

|             |          |          |           |
|-------------|----------|----------|-----------|
| Fe1–O17–Fe2 | 133.2(3) | 131.3(3) | 132.71(6) |
| Fe1–O17–Fe3 | 130.0(3) | 131.8(3) | 127.81(6) |
| Fe2–O17–Fe3 | 96.8(2)  | 96.8(2)  | 99.31(5)  |
| Fe4–O18–Fe2 | 130.1(3) | 131.0(3) | 131.60(7) |
| Fe4–O18–Fe3 | 132.5(3) | 131.7(3) | 128.64(6) |
| Fe2–O18–Fe3 | 97.2(2)  | 96.7(2)  | 99.64(5)  |

*Fe1 angles*

|            |          |          |           |
|------------|----------|----------|-----------|
| O1–Fe1–O5  | 113.8(2) | 115.4(2) | 114.09(6) |
| O5–Fe1–O17 | 123.8(2) | 124.9(2) | 119.60(5) |
| O17–Fe1–O1 | 122.4(2) | 119.7(2) | 126.24(6) |
| N1–Fe1–O1  | 89.7(2)  | 87.0(2)  | 87.49(5)  |
| N1–Fe1–O5  | 90.4(2)  | 91.7(2)  | 95.34(5)  |
| N1–Fe1–O17 | 90.5(2)  | 92.1(2)  | 90.22(5)  |

|                   |          |          |           |
|-------------------|----------|----------|-----------|
| N4–Fe1–O1         | 89.6(2)  | 93.6(2)  | 89.39(5)  |
| N4–Fe1–O5         | 85.7(2)  | 83.9(2)  | 87.12(5)  |
| N4–Fe1–O17        | 93.7(2)  | 91.6(2)  | 90.57(5)  |
| N1–Fe1–N4         | 175.4(2) | 175.4(2) | 176.62(5) |
| <i>Fe2 angles</i> |          |          |           |
| O17–Fe2–O18       | 82.9(2)  | 82.9(2)  | 80.59(5)  |
| O18–Fe2–N10       | 88.6(2)  | 88.7(2)  | 87.11(5)  |
| N10–Fe2–N3        | 104.3(2) | 103.8(2) | 104.64(5) |
| N3–Fe2–O17        | 84.8(2)  | 85.5(2)  | 87.87(4)  |
| O13–Fe2–O17       | 92.7(2)  | 91.8(2)  | 102.07(5) |
| O13–Fe2–O18       | 100.1(2) | 99.5(2)  | 96.04(5)  |
| O13–Fe2–N10       | 83.8(2)  | 83.8(2)  | 82.97(5)  |
| O13–Fe2–N3        | 89.2(2)  | 90.1(2)  | 82.55(5)  |
| O4–Fe2–O17        | 99.8(2)  | 102.5(2) | 95.87(5)  |
| O4–Fe2–O18        | 92.3(2)  | 90.2(2)  | 102.57(5) |
| O4–Fe2–N10        | 85.5(2)  | 83.4(2)  | 82.97(5)  |
| O4–Fe2–N3         | 81.1(2)  | 83.3(2)  | 82.31(5)  |
| O17–Fe2–N10       | 170.2(2) | 169.7(2) | 167.10(5) |
| O18–Fe2–N3        | 164.9(2) | 165.1(2) | 167.84(5) |
| O13–Fe2–O4        | 163.4(2) | 163.6(3) | 155.99(5) |
| <i>Fe3 angles</i> |          |          |           |
| O17–Fe3–O18       | 83.1(2)  | 83.6(2)  | 80.31(5)  |
| O18–Fe3–N7        | 85.1(2)  | 84.0(2)  | 89.65(5)  |
| N7–Fe3–N6         | 103.8(2) | 104.3(2) | 100.75(5) |
| N6–Fe3–O17        | 88.7(2)  | 88.7(2)  | 89.33(5)  |

|            |          |          |           |
|------------|----------|----------|-----------|
| O8–Fe3–O17 | 98.1(2)  | 99.0(2)  | 94.05(5)  |
| O8–Fe3–O18 | 90.6(2)  | 93.3(2)  | 97.65(5)  |
| O8–Fe3–N6  | 84.0(2)  | 82.0(2)  | 83.92(5)  |
| O8–Fe3–N7  | 89.6(2)  | 88.7(2)  | 84.69(6)  |
| O9–Fe3–O17 | 90.3(2)  | 91.4(2)  | 99.16(6)  |
| O9–Fe3–O18 | 100.3(2) | 99.3(2)  | 95.58(6)  |
| O9–Fe3–N6  | 86.2(2)  | 86.8(2)  | 85.08(6)  |
| O9–Fe3–N7  | 84.4(2)  | 83.8(2)  | 84.27(6)  |
| O17–Fe3–N7 | 166.0(2) | 165.7(2) | 169.63(5) |
| O18–Fe3–N6 | 169.5(2) | 170.3(2) | 169.60(5) |
| O8–Fe3–O9  | 167.0(2) | 164.6(2) | 162.68(6) |

*Fe4 angles*

|             |          |          |           |
|-------------|----------|----------|-----------|
| O18–Fe4–O12 | 118.5(2) | 122.4(2) | 123.22(6) |
| O12–Fe4–O16 | 116.0(2) | 112.7(2) | 115.03(6) |
| O16–Fe4–O18 | 125.4(2) | 124.8(2) | 121.75(6) |
| N9–Fe4–O18  | 90.8(2)  | 93.2(2)  | 88.92(5)  |
| N9–Fe4–O12  | 87.9(2)  | 88.8(2)  | 85.32(6)  |
| N9–Fe4–O16  | 89.2(2)  | 89.1(2)  | 96.30(6)  |
| N12–Fe4–O18 | 92.1(2)  | 91.8(2)  | 87.44(5)  |
| N12–Fe4–O12 | 95.2(2)  | 90.2(2)  | 94.60(5)  |
| N12–Fe4–O16 | 85.0(2)  | 86.4(2)  | 87.73(6)  |
| N9–Fe4–N12  | 174.2(2) | 174.6(2) | 175.60(5) |

---

**Table S2.** Selected distances (Å) for compounds **1**, **2** and **3** computed at the UB3LYP/6-31G(d) (1<sup>st</sup> row), UM06/6-31G(d) (2<sup>nd</sup> row) and UM06/6-311G(d) (3<sup>rd</sup> row) levels of theory. Experimental average values for **1**·1.5<sup>i</sup>Pr<sub>2</sub>O and **2**·2<sup>i</sup>Pr<sub>2</sub>O are reported in *italics* on side columns.<sup>1</sup>

|           | <b>1</b> | <b>1</b> ·1.5 <sup>i</sup> Pr <sub>2</sub> O | <b>2</b> | <b>2</b> ·2 <sup>i</sup> Pr <sub>2</sub> O | <b>3</b> |
|-----------|----------|----------------------------------------------|----------|--------------------------------------------|----------|
| Fe1–O17   | 1.835    |                                              | 1.844    |                                            | 1.846    |
|           | 1.823    |                                              | 1.828    |                                            | 1.834    |
|           | 1.818    | <i>1.788</i>                                 | 1.825    | <i>1.802</i>                               | 1.829    |
| Fe2–O17   | 1.983    |                                              | 1.984    |                                            | 1.976    |
|           | 1.952    |                                              | 1.948    |                                            | 1.946    |
|           | 1.951    | <i>1.960</i>                                 | 1.947    | <i>1.945</i>                               | 1.944    |
| Fe1–O1    | 1.912    |                                              | 1.914    |                                            | 1.912    |
|           | 1.891    |                                              | 1.889    |                                            | 1.892    |
|           | 1.892    | <i>1.892</i>                                 | 1.890    | <i>1.885</i>                               | 1.891    |
| Fe1–N1    | 2.196    |                                              | 2.187    |                                            | 2.177    |
|           | 2.167    |                                              | 2.158    |                                            | 2.147    |
|           | 2.170    | <i>2.182</i>                                 | 2.157    | <i>2.178</i>                               | 2.150    |
| Fe2–O4    | 1.935    |                                              | 1.939    |                                            | 1.943    |
|           | 1.948    |                                              | 1.950    |                                            | 1.961    |
|           | 1.956    | <i>1.937</i>                                 | 1.959    | <i>1.953</i>                               | 1.967    |
| Fe2–N3    | 2.313    |                                              | 2.307    |                                            | 2.309    |
|           | 2.241    |                                              | 2.239    |                                            | 2.224    |
|           | 2.224    | <i>2.216</i>                                 | 2.224    | <i>2.245</i>                               | 2.211    |
| Fe1...Fe2 | 3.463    |                                              | 3.476    |                                            | 3.467    |
|           | 3.422    |                                              | 3.426    |                                            | 3.431    |
|           | 3.419    | <i>3.417</i>                                 | 3.425    | <i>3.398</i>                               | 3.427    |



|           |       |       |       |       |       |
|-----------|-------|-------|-------|-------|-------|
| Fe1...Fe4 | 6.229 |       | 6.262 |       | 6.243 |
|           | 6.156 |       | 6.174 |       | 6.187 |
|           | 6.155 | 6.170 | 6.174 | 6.113 | 6.183 |
| Fe2...Fe3 | 3.030 |       | 3.020 |       | 3.018 |
|           | 2.990 |       | 2.973 |       | 2.967 |
|           | 2.980 | 2.933 | 2.965 | 2.968 | 2.957 |

---

<sup>1</sup> for computed geometries, only distances between symmetry-unique atoms are reported, considering that the complexes approximate very close the *D*2 point-group symmetry. The values reported for the experimental geometries (Table S1) are obtained by averaging the distances between equivalent atoms hypothesizing the same *D*2 symmetry. Corresponding experimental distances of molecules A and B of **1**·1.5<sup>i</sup>Pr<sub>2</sub>O are further averaged between them.

---

Compound 1

Compound 2

Compound 3

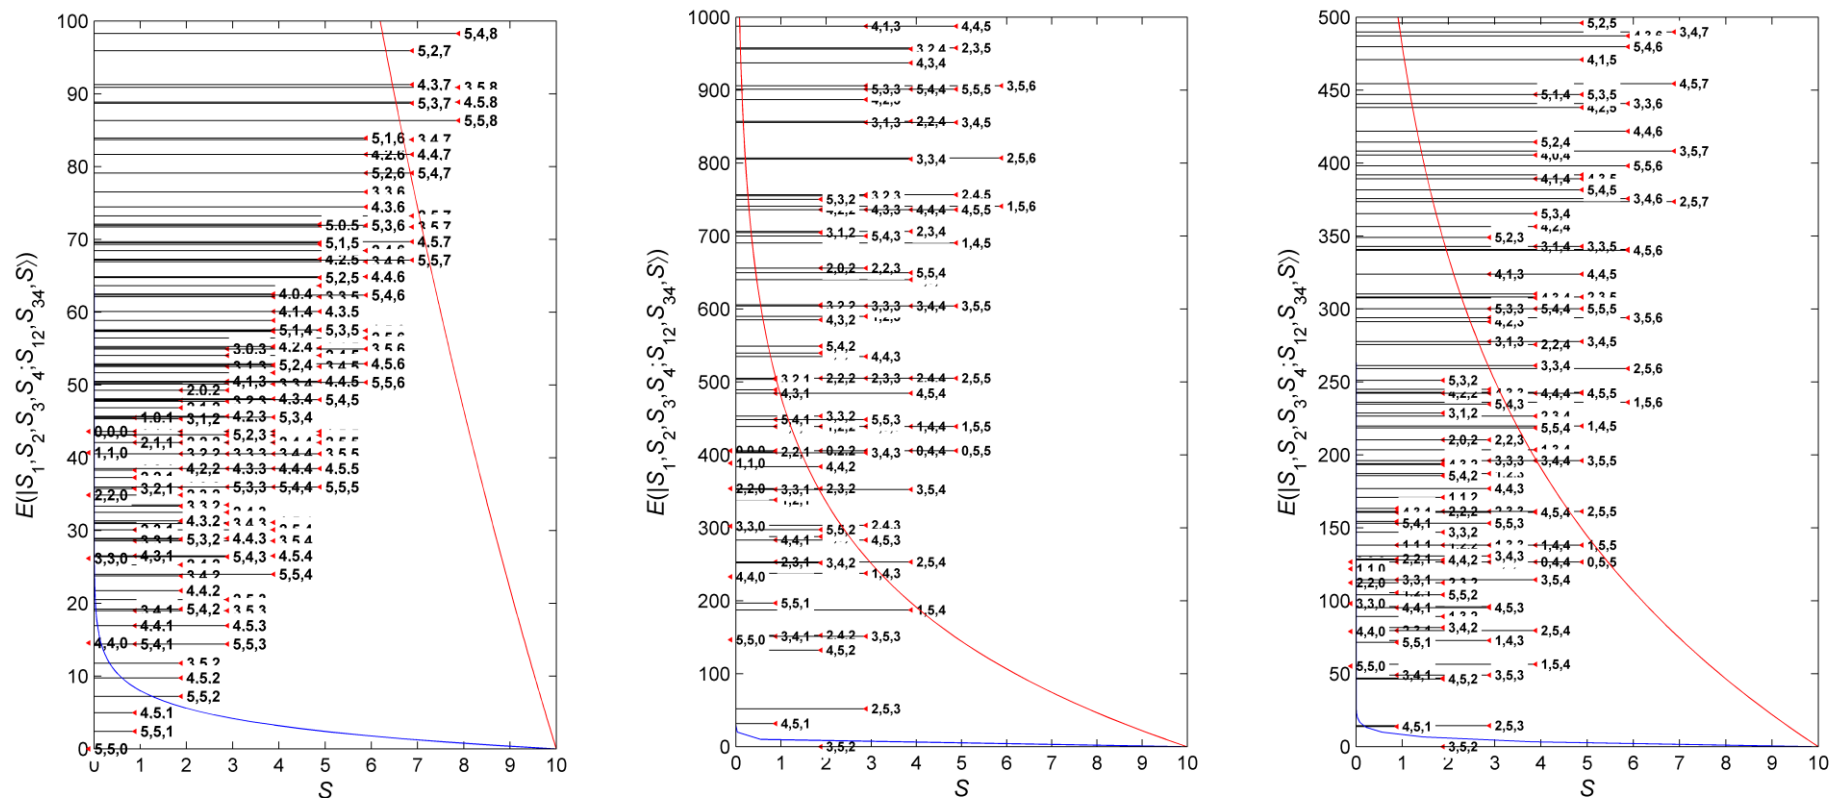

**Figure S3.** Spin states of compounds **1–3** as obtained by the best-fit procedure. The states are ordered as to their energy  $E$  (cm<sup>-1</sup>) from the ground state and labeled as  $|S_{bb}=S_{12}, S_{ww}=S_{34}, S\rangle$ . The blue and red lines indicate the Boltzmann population of the spin states at 5 and 300 K, respectively.
